# Supplementary material
Source: publisher figshare collection journal article supplement (https://acs.figshare.com/ndownloader/files/7356475)
Supplement: Supplementary file 1 [file 7356475]

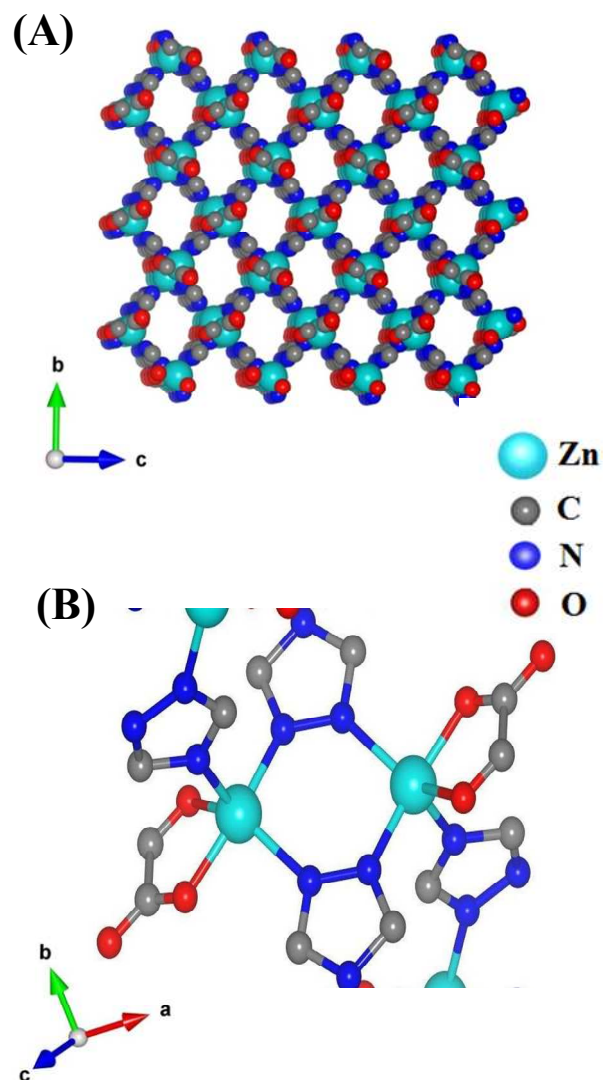

**Figure S2.** The pore structure (A) and local crystal structure (B) of  $\text{ZOTW}_x(1\text{h})\text{deCO}_2$  simulated using the molecular structure of oxalate ion by the Rietveld method.
